# Supplementary material for: The Size-Dependent Photonic Characteristics of Colloidal-Quantum-Dot-Enhanced Micro-LEDs
Source: MDPI journal article supplement (doi:10.3390/mi14030589), 2023-02-28
Supplement: s1 [file s1]

# The Size-dependent Photonic Characteristics of Colloidal-Quantum-Dot-Enhanced micro-LEDs

Kai-Ling Liang, Wei-Hung Kuo and Chien-Chung Lin and Yen-Hsiang Fang

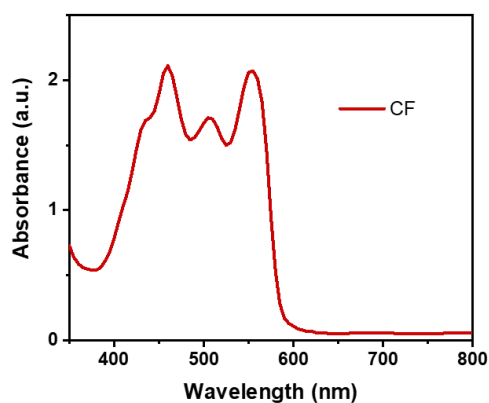

**Figure S1.** Absorption spectrum of color filter (CF) applied on red QD.

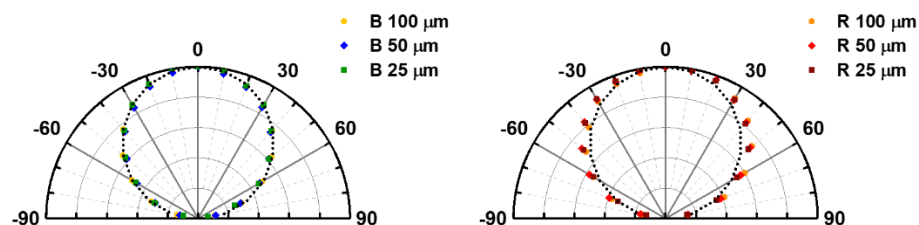

**Figure S2.** Measured and simulated far-field radiation of different sizes of  $100 \times 100$ ,  $50 \times 50$ , and  $25 \times 25 \mu\text{m}^2$  micro-LEDs in blue and red light, respectively.
